# Supplementary material
Source: Springer Nature journal article supplement (https://www.springermedizin.de/resource/supplementary/12933_2005_38_MOESM5_ESM.pdf/9539486)

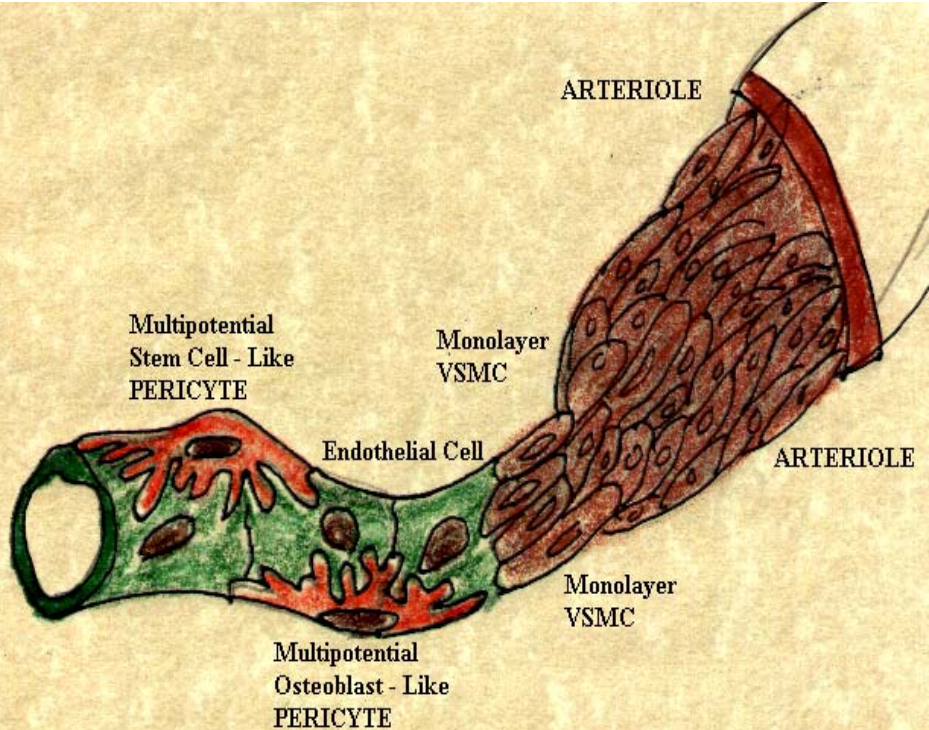

Supplement: MOESM5 [file 9539486]
